# Supplementary material
Source: PubMed Central journal article supplement (PMC5511041)
Supplement: NIHMS869898-supplement-2.pdf [file NIHMS869898-supplement-2.pdf]

**Supplementary Table 1**

| <b>Model<br/>Parameter</b> | <b>Value</b> |
|----------------------------|--------------|
| $W_{EE}$                   | 16           |
| $W_{IPVE}$                 | 20           |
| $W_{EIPV}$                 | 26           |
| $W_{IPVIPV}$               | 1            |
| $W_{ISOME}$                | 0.25         |
| $W_{IPVISOM}$              | 1            |
| $W_{EISOM}$                | 15           |
| $W_{ISOMISOM}$             | 0.025        |
| $W_{ISOMIPV}$              | 0            |
| $W_{IPVEL23}$              | 0.5          |
| $W_{ISOMEL23}$             | 2            |
| $W_{EEL23}$                | 0            |
| $\tau_E$ (ms)              | 20           |
| $\tau_I$ (ms)              | 10           |
| $m_E$                      | .25          |
| $\theta_E$                 | -11          |
| $m_{ISOM}$                 | 0.1          |
| $\theta_{ISOM}$            | 0.65         |
| $m_{IPV}$                  | 0.005        |
| $\theta_{IPV}$             | 13           |
| $MIN_{i_{EL23}}$           | 1.4          |
| $m_{i_{EL23}}$             | 0.2          |
